A manuscript submitted to *mSystems*

1

2

3

4 **A resistome roadmap: from the human body to pristine environments**

5

6 Lucia Maestre-Carballa<sup>1</sup>, Vicente Navarro-López<sup>2</sup> and Manuel Martínez-García<sup>1\*</sup>.

7

8 <sup>1</sup>Department of Physiology, Genetics and Microbiology, University of Alicante,  
9 Alicante, 03080, Spain.

10 <sup>2</sup>Clinical Microbiology and Infectious Disease Unit, Hospital Universitario Vinalopó,  
11 Elche, Spain.

12

13 Lucia Maestre-Carballa: l.maestre@ua.es

14 Vicente Navarro-López: vnavarro@ucam.edu

15 Manuel Martínez-García: m.martinez@ua.es

16

17 \*Corresponding author: m.martinez@ua.es

18

19

20

21

22

23

24

25

A manuscript submitted to *mSystems*

## 26 **Abstract**

27 A comprehensive characterization of the human body resistome (sets of antibiotic  
28 resistance genes (ARGs)) is yet to be done and paramount for addressing the antibiotic  
29 microbial resistance threat. Here, we study the resistome of 771 samples from five  
30 major body parts (skin, nares, vagina, gut and oral cavity) of healthy subjects from the  
31 Human Microbiome Project and addressed the potential dispersion of ARGs in pristine  
32 environments. A total of 28,731 ARGs belonging to 344 different ARG types were  
33 found in the HMP proteome dataset ( $n=9.1 \times 10^7$  proteins analyzed). Our study reveals a  
34 distinct resistome profile (ARG type and abundance) between body sites and high inter-  
35 individual variability. Nares had the highest ARG load ( $\approx 5.4$  genes/genome) followed  
36 by the oral cavity, while the gut showed one of the highest ARG richness (shared with  
37 nares) but the lowest abundance ( $\approx 1.3$  genes/genome). Fluroquinolone resistance genes  
38 were the most abundant in the human body, followed by macrolide-lincosamide-  
39 streptogramin (MLS) or tetracycline. Most of the ARGs belonged to common bacterial  
40 commensals and multidrug resistance trait was predominant in the nares and vagina.  
41 Our data also provide hope, since the spread of common ARG from the human body to  
42 pristine environments ( $n=271$  samples; 77 Gb of sequencing data and  $2.1 \times 10^8$  proteins  
43 analyzed) thus far remains very unlikely (only one case found in an autochthonous  
44 bacterium from a pristine environment). These findings broaden our understanding of  
45 ARG in the context of the human microbiome and the One-Health Initiative of WHO  
46 uniting human host-microbes and environments as a whole.

47

48

## 49 **Importance**

50 The current antibiotic resistance crisis affects our health and wealth at a global scale and  
51 by 2050 predictions estimate 10 million deaths attributed to antibiotic resistance  
52 worldwide. Remarkably, a comprehensive analysis of ARG diversity and prevalence in  
53 different human body sites is yet to be done. Undoubtedly, our body and human built-  
54 environment have antibiotic resistant bacteria than can also be transported to other  
55 environments. Hence, the analysis of Human Microbiome Project dataset provides us  
56 not only the opportunity to explore in detail the ARGs diversity and prevalence in  
57 different parts of our body but also to provide some insights into the dispersion of  
58 ARGs from human to natural populations inhabiting pristine environments. Thus, our  
59 data would help to establish a baseline in ARG surveillance protocols to assess further  
60 changes in antibiotic resistances in our society.

61

62

63

64

65

A manuscript submitted to *mSystems*

## 66 **Introduction**

67 Since the discovery of antibiotics, human and animal health has profoundly changed.  
68 Undoubtedly, antibiotics have not only saved millions of lives but also have  
69 transformed modern medicine (Ventola, 2015; Centers for Disease Control and  
70 Prevention, 2019). Nevertheless, antibiotic overuse, incorrect prescription, extensive use  
71 of antibiotics in agriculture and farming and the low availability of new antibiotics have  
72 led to a major antibiotic resistance crisis, wherein bacterial pathogens are becoming  
73 resistant to available antibiotics (Ventola, 2015). In the US, it has been estimated that  
74 antibiotic-resistant organisms cause 2.8 million infections and 35,900 deaths each year  
75 (Centers for Disease Control and Prevention, 2019). This not only is a health issue but  
76 also affects food security and requires significant financial investment. For instance, it  
77 has been estimated that in 2017, the annual treatment of six multidrug-resistant bacteria  
78 costs approximately \$4.6 billion to the US healthcare system (Nelson *et al.*, 2021). By  
79 2050, predictions estimate that over 10 million deaths and a total cost of  $\approx$ 100 trillion  
80 USD will be attributed to antibiotic resistance worldwide (Brogan and Mossialos, 2016;  
81 O'Neill, 2016), and recently, the WHO estimated that in 10 years, antimicrobial  
82 resistance could force up to 24 million people into extreme poverty (IACG, 2019).

83 Antibiotic resistance is a natural process in which bacteria become resistant to  
84 antibiotics using different mechanisms, which are classified as phenotypic resistance  
85 (due to physiological changes and nonhereditary) or acquired (when antibiotic  
86 resistance is genetically gained) (Olivares *et al.*, 2013). Different antibiotic resistance  
87 genes (ARGs) that confer resistance to antibiotics could be acquired due to mutations in  
88 the bacterial genome or through horizontal gene transfer (HGT). The transference of  
89 ARGs could be mediated by bacteria, viruses, plasmids or even vesicles (Emamalipour  
90 *et al.*, 2020). Among the possible antibiotic classifications, the most common are the  
91 ones based on their chemical structure (drug classes, e.g, tetracycline, beta-lactams,  
92 aminoglycosides...), mode of action (determined by the antibiotic target, mainly  
93 proteins, cell membrane and nucleic acids) and spectrum of activity (from narrow to  
94 broad) (Wright, 2010; Etebu and Ariekpar, 2016; Reygaert, 2018).

95 The occurrence of antibiotic resistance has increased and accelerated since antibiotics  
96 are constantly present in the environment, derived from anthropogenic sources such as  
97 wastewater treatment plants, hospitals or domestic use (Rodriguez-Mozaz *et al.*, 2020).  
98 Another cause of this increase is the dispersion of resistant bacteria from hot spots, such

A manuscript submitted to *mSystems*

99 as wastewater treatment plants (from our own human microbiome) and built  
100 environments (i.e., microorganisms found in human-constructed environments) (Baron  
101 *et al.*, 2018; Centers for Disease Control and Prevention, 2019), which continuously  
102 disseminates our microbes and thus parts of their genetic content.

103 The human microbiome project (HMP) (Methé *et al.*, 2012), an interdisciplinary effort,  
104 was developed with the objective of characterizing the human microbiome. For this  
105 purpose, samples from different major body parts of healthy humans were obtained and  
106 sequenced, producing one of the largest resources for the study of the human  
107 microbiome (Huttenhower *et al.*, 2012). To the best of our knowledge, comprehensive  
108 analysis and cross-comparison of the human resistome from all human body parts  
109 studied within the HMP have not been performed, but to date, some valuable but  
110 separate and non-interconnected studies have been performed for the oral cavity and the  
111 skin (Carr *et al.*, 2020; Li *et al.*, 2021). Addressing the abundance and diversity of  
112 ARGs as a whole in all human body parts has enormous potential to broaden our  
113 knowledge on the dispersion of ARGs from human bacteria within different microbial  
114 populations in nature.

115 Thus, here, in the context of antibiotic resistance-related health concerns, in addition to  
116 analyzing in detail the antibiotic resistance genes present in the HMP-studied body sites,  
117 we studied the potential spread of ARGs from the human body to different types of  
118 pristine environments. These environments are supposed to be undisturbed and not  
119 affected by anthropic actions. While many places, such as caves or polar environments  
120 with no apparent and visible human activity, are often perceived as pristine  
121 environments, human activity unfortunately leaves an indirect ever-increasing footprint.  
122 Here, we use some of these pristine environments as a model to address and estimate  
123 the potential “mobility” of common human ARGs found in the human body to better  
124 assess the global impact of antibiotic resistance in our ecosystems, in line with the One  
125 Health concept (i.e., human health and animal health are interdependent and bound to  
126 ecosystems) (Atlas, 2012). Pristine environments are commonly used as “reporter  
127 ecosystems” to monitor pollution and climate change and, in our case, specifically to  
128 measure how deep the potential impact of the spread of antibiotic resistance is.

129

130

A manuscript submitted to *mSystems*

## 131 **Results**

### 132 **Comprehensive metagenomic characterization of the human resistome**

133 The HMP (Huttenhower *et al.*, 2012) aimed to characterize the diversity and metabolic  
134 potential of the microbiomes of healthy human subjects from different body sites. In  
135 this study, we analyzed the resistome (i.e., pool of antibiotic resistance genes) of these  
136 body parts, examining a total of 771 HMP samples from the oral cavity, skin, nares,  
137 vagina and gut (Suppl. Table 1 and 2). Detection of ARGs was performed using amino  
138 acid sequence similarity searching against the following reference ARG databases (see  
139 methods for details): CARD 3.0.3 (Jia *et al.*, 2017), RESFAMS (Gibson *et al.*, 2015)  
140 and ARG\_ANNOT (Gupta *et al.*, 2014). ARGs with an e-value  $\leq 10^{-5}$ , amino acid  
141 identity  $\geq 90\%$  and bit score  $\geq 70$  were considered *bona fide* ARG hits.

142 From all the detected HMP proteins ( $9.17E+07$ ), a total of 28,731 ARG hits were found,  
143 representing between 0.02 and 0.08% of the relative abundance of HMP proteins  
144 depending on the body site analyzed (Suppl. Table 2). Overall, nearly all analyzed  
145 samples (99%) from the different human body sites showed at least one ARG. The  
146 exceptions were some specific HMP samples from the nares ( $\approx 14\%$  of nares samples),  
147 skin (4.25% of skin samples) and vagina (45% of vagina samples), in which no ARG  
148 was detected (Suppl. Table 2).

149 On average, tetracycline resistance genes were the most abundant antibiotic resistance  
150 genes in the HMP dataset (Fig. 1A and B), followed by MLS or fluoroquinolone  
151 resistance genes, the ranks of which were dependent on the analyzed body site.  
152 Tetracycline resistance genes were the most abundant ARGs in vagina (53.4%) and gut  
153 (40.52%), whereas their abundance decreased in oral cavity, skin and nares (26.02, 9.03  
154 and 10.45%), where the most dominant antibiotic resistance genes were, respectively,  
155 fluoroquinolone (30%), multidrug (18.22%) and beta-lactamase resistance genes  
156 ( $\approx 20\%$ ) (Fig. 1A). In gut samples, the second most abundant resistance genes were the  
157 ones conferring resistance against beta-lactamases (as in skin), while in the vagina, the  
158 second most abundant were multidrug resistance genes (19.37%). Aminocoumarin  
159 resistance genes were only found in the gut, while peptide antibiotic resistance genes  
160 were found in all body parts analyzed and they were more frequent in skin and nares  
161 (representing a 6-fold increase compared with the relative abundance of this antibiotic  
162 class resistance gene in the rest of the body).

A manuscript submitted to *mSystems*

163 All samples from the oral cavity (hard palate, buccal mucosa, saliva, subgingival and  
164 supragingival plaque, attached/keratinized gingivae, tongue dorsum, throat and palatine  
165 tonsils) showed a similar pattern of resistance to the different antibiotic classes with  
166 minor variations (Fig. 1B; Suppl. Fig. 1). Separated from the oral cavity, the skin and  
167 nares showed similar dominant antibiotic resistance genes grouped by drug classes  
168 (fluoroquinolone, multidrug, macrolide-lincosamide-streptogramin (MLS) and beta-  
169 lactamase resistance), although the ARG in nares displayed resistance to 14 different  
170 drug classes, while ARG present in skin displayed resistance to 10 different drug  
171 classes. The bacteria from the vagina had resistance against 8 antibiotic classes, being  
172 the lowest number of the 5 body parts compared in this study (the top three ARG ranked  
173 were tetracycline, fluoroquinolone and MLS resistance genes). Remarkably, nares and  
174 gut showed resistance to the highest number of antibiotic classes (14 out of the 16  
175 different classes found in this study).

176 As shown in Fig. 1C, the body part that had the highest abundance of ARGs per  
177 assembled mega-base pair (Mb) was the nares ( $1.86 \pm 2.32$  ARGs/Mb), followed by the  
178 skin ( $1.22 \pm 1.42$  ARGs/Mb) and oral cavity ( $0.90 \pm 0.88$  ARGs/Mb) (Fig. 1C). It is worth  
179 noting that the gut ( $0.34 \pm 0.33$  ARGs/Mb) had the lowest amount of ARGs per Mb  
180 among all the analyzed body parts (Fig. 1C). The Welch test employed to compare the  
181 abundance of different body parts showed statistically significant differences (P-  
182 value  $\leq 0.05$ ) between almost all body parts but not between the skin and nares (Fig. 1C).  
183 No significant differences were found between male and female subjects in any of the  
184 body sites analyzed (Suppl. Fig. 2). According to recent estimates of the average  
185 genome size (AGS) of human microbes from different body parts of HMP datasets  
186 (Nayfach and Pollard, 2015), in general, the correlation of ARGs and the AGS indicated  
187 that the number of ARGs per bacterial genome ranged from 1.3 in stool (AGS=3.9 Mb)  
188 to 3 in nares (AGS $\approx$ 2.5 Mb).

### 189 **Characterization of dominant antibiotic resistance genes in the human body**

190 In this section, beyond the above-described diversity and abundance of antibiotic  
191 resistance gene classes in the HMP dataset, we sought to study in detail the pool of  
192 different types of ARGs and the identity of antibiotic-resistant microbes harboring these  
193 ARGs. Within each of the antibiotic classes, different types of ARGs are described in  
194 databases (2404 in CARD (Jia *et al.*, 2017), 2038 in ARG\_ANNOT (Gupta *et al.*,  
195 2014), and 3169 in RESFAMS (Gibson *et al.*, 2015)). In addition, based on the

A manuscript submitted to *mSystems*

196 antibiotic mechanism of action (Reygaert, 2018), five types of antibiotics are defined:  
197 antibiotics that 1) inhibit cell wall synthesis (e.g., beta-lactams), 2) depolarize the cell  
198 membrane (e.g., lipopeptides), 3) target nucleic acid synthesis (e.g., quinolones), 4)  
199 inhibit metabolic pathways (e.g., sulfonamides) and 5) affect protein synthesis (e.g.,  
200 MLS antibiotics or tetracyclines) (Reygaert, 2018). Therefore, ARGs could provide  
201 protection against one specific antibiotic or different types of antibiotics.

202 In the HMP datasets, after comparison with all three of the above ARG databases, a  
203 total of 344 different type of ARGs were found in all the analyzed samples (Suppl.  
204 Table 3 and 4). The gut samples had 198 different ARGs, the highest number and  
205 diversity among the analyzed body sites, while the lowest ARG diversity was found in  
206 the vagina (46) (Suppl. Table 4). The most abundant type of ARG in the oral cavity was  
207 *patB*, which provides resistance to fluoroquinolones via antibiotic efflux (ARO:  
208 3000025). The *fmtC* gene was the predominant ARG in the nares and skin, while *tetQ*  
209 was the most common ARG in the gut and in the vagina, the most frequent gene was  
210 *tetM* (Suppl. Table 4).

211 Regarding the identification of the most common antibiotic resistant (AR) bacteria in  
212 HMP datasets (Fig. 2) based on the best-hit score, as expected, the results differed  
213 among body parts. The oral cavity had 326 different species harboring ARGs, followed  
214 by the gut (257 different species). The skin showed the lowest number of different  
215 species with ARGs (a total of 52) (Fig. 2). *Streptococcus mitis* was the most abundant  
216 AR bacterium in the oral cavity. In the gut, the most abundant AR bacterium was  
217 *Escherichia coli*, while in nares and skin, *Staphylococcus* was the predominant AR  
218 bacterium (*Staphylococcus aureus* in nares and *Staphylococcus epidermis* in skin).  
219 Finally, *Gardnerella vaginalis* was the most abundant resistant species in the vagina. *S.*  
220 *aureus*, *E. coli* and *Bacteroides fragilis* were the most abundant AR bacteria found in all  
221 body sites (Fig. 2). Remarkably, from the total ARG hits found in the HMP (n=28,731),  
222 only one example detected in the oral cavity was detected with high confidence in a  
223 viral genome fragment of a human herpesvirus carrying *APH(4)-Ia*; this ARG was an  
224 aminoglycoside phosphotransferase that inactivates aminoglycosides (human subject  
225 765560005, buccal mucosa, Suppl. Table 5).

226



A manuscript submitted to *mSystems*

227 The increasing multiantibiotic-resistant bacteria (MRBs) are a major threat to human  
228 health. We next attempted to identify genome fragments (i.e. contigs) having two or  
229 more ARGs which provide insights into multiple-antibiotic resistance (MR) bacteria in  
230 HMP datasets. For this purpose, we applied the criteria for the detection of more than  
231 one ARG in the same assembled genome fragment, conferring resistance to at least two  
232 different antibiotics classes in each of the analyzed HMP samples. The percentage of  
233 metagenomic samples from the HMP with the presence of MR was between  $\approx 25\%$  (oral  
234 cavity) and 6% (vagina). Twenty-one percent of the analyzed gut samples had  $>1$  contig  
235 conferring multi-antibiotic resistance potential, whereas in the skin, the percentage was  
236 19%, and in nares, 15% of the samples showed MR (Fig. 3A). The MR frequency  
237 changed depending on the studied group. Vagina samples showed the highest multi-  
238 antibiotic resistance-related contig frequency, with a large difference among vaginal  
239 samples ( $0.42 \pm 0.27$  MRB/assembled Mb). The skin, oral cavity and gut had the lowest  
240 frequency of MR (Fig. 3B).

241 The most abundant MR species in each body site were the same in all cases and were  
242 also detected as the most predominant resistant bacteria (Fig. 3C). The MR profile was  
243 different depending on the sampling site. In the vagina there was only one MR species  
244 whereas in skin, there were only 2 main species carrying more than one ARG, while the  
245 gut had 23 MR species, with the highest number of different MR found in all body sites.  
246 None of the MRB species were found in all the body parts. In fact, 6 species  
247 (*Bacteroides* sp. 4\_1\_36, *Bacteroides fragilis*, *Enterococcus faecium*, *Staphylococcus*  
248 *aureus*, *Staphylococcus epidermidis*, *Streptococcus mitis*) out of the 33 MRBs found  
249 were in two or three different parts of the body, while the rest were only body site  
250 specific (Suppl. Fig. 3).

251 When all of the above ARGs detected in healthy humans were clustered ( $\geq 90\%$  amino  
252 acid identity) to study a highly conserved core of shared ARGs, it was observed that  
253 there were 3 common ARGs in all the body parts. One, MFS-type efflux protein  
254 (*msrD*), was related to resistance to macrolides. The other 2 genes were related to  
255 ribosomal resistance against tetracycline (*tetO* and *tetQ*) associated with conjugative  
256 plasmids or transposons. In feces, *tetO* was found not only in bacteria belonging to the  
257 phylum Firmicutes (*Clostridiales bacterium VE202-13*; Ga0104838\_1543581) but also  
258 in bacteria of the phylum Actinobacteria (*Trueperella pyogenes MS249*;  
259 Ga0111491\_10662371).



A manuscript submitted to *mSystems*

## 260 **Detection of Human Microbiome Project ARGs in pristine environments**

261 Resistomes and ARGs dispersion from hot spots such as wastewater plants or hospitals  
262 to downstream aquatic environments have been extensively studied and characterized  
263 (Rowe *et al.*, 2017; Ju *et al.*, 2018; Khan *et al.*, 2019). Although the presence of ARGs  
264 in environments with low or scarce human intervention has been explored (Van  
265 Goethem *et al.*, 2018; Naidoo *et al.*, 2020), to the best of our knowledge, it has never  
266 been explored whether common ARGs from HMP datasets are present in autochthonous  
267 bacteria from different pristine environments.

268 To determine the presence of ARGs from the HMP in pristine environments (Fig. 4;  
269 polar, desert, cave, hot spring, and submarine volcano environments; Suppl. Table 6)  
270 with no *a priori* anthropogenic influence, proteins from 271 different pristine  
271 environments (i.e. metagenomic datasets) were screened to search for ARGs detected in  
272 the analyzed HMP samples. Only those proteins with identity  $\geq 90\%$ , with bit-score  $\geq 70$   
273 and belonging to genomic scaffolds with at least 4 proteins were considered for further  
274 analysis. It is important to remark that if an ARG from the HMP dataset is detected in a  
275 genome fragment from a pristine environment, two different hypothesis could be  
276 considered: this detected ARG in pristine environments was 1) an allochthon HMP gene  
277 dispersed from anthropic areas that was acquired by autochthonous bacteria inhabiting  
278 the pristine environment, or 2) this ARG in pristine environments is actually the result  
279 of contamination during sample manipulation, collection or post-processing (e.g., DNA  
280 contaminant fragments in reagents from kits, DNA sequencing and other  
281 metagenomics-related experiments) and thus is not truly present in these pristine  
282 environments.

283 In the 271 analyzed samples from pristine environments (a total of 77 Gb of sequencing  
284 information and  $2.1E+08$  analyzed proteins), we detected a total of 9 ARGs from HMP  
285 dataset. Only one of those ARGs were found in a genome fragment of a putative  
286 autochthonous bacterium from the family *Rhodobacteraceae* recovered in a submarine  
287 volcano (Fig. 4; Suppl. Table 7; a chloramphenicol acetyltransferase gene 100% amino  
288 acid identical with the HMP gene dataset). The rest and great majority of detected  
289 ARGs in pristine environments were simply exogenous contaminant present in these  
290 metagenomes from manipulation or laboratory reagents. For instance, it is obvious that  
291 *Escherichia coli* should not be detected in hot springs. However, we indeed found

A manuscript submitted to *mSystems*

292 ARGs in *E. coli* genome fragments in the corresponding hot spring metagenomes (Fig.  
293 4, bottom right panel).

## 294 **Discussion**

295 The human resistome has received increased attention in recent years due to its impact  
296 in our society. Usually, resistome studies focus their attention on one body site, usually  
297 studying the gut (Hu *et al.*, 2013; Palleja *et al.*, 2018) or, more recently, the skin (Li *et*  
298 *al.*, 2021). To our knowledge, only one study has compared resistome traits from the gut  
299 with different parts of the oral cavity, examined via different protocols (Carr *et al.*,  
300 2020). In our study, the advantage of using only HMP samples that were subjected to  
301 standardized procedures was the elimination of biases and variability introduced by  
302 contrasting procedures from different surveys (Huttenhower *et al.*, 2012). Here, in our  
303 study, we found that the most abundant ARGs in the HMP resistome provided  
304 resistance against fluoroquinolone, MLS and tetracycline resistance genes, followed by  
305 multidrug resistance genes and beta-lactamases. Members of these antibiotic classes  
306 were among the most commonly prescribed oral antibiotics in 2010 (Hicks *et al.*, 2013),  
307 right before the samples were obtained, which shows a plausible relation between the  
308 consumed antibiotics and the detected resistance in American subjects, even though we  
309 cannot rule out the influence of antibiotics consumed through the food (Salyers *et al.*,  
310 2004). A human gut study from Chinese, Spanish and Danish subjects showed that more  
311 than 75% of the ARGs were tetracycline resistance genes, MLS resistance genes and  
312 beta-lactamases (Hu *et al.*, 2013). This was consistent with our data since these three  
313 antibiotic classes accounted for 61% of the relative abundance found in our study with  
314 HMP samples (Van Boeckel *et al.*, 2014). The characterization of resistomes from  
315 metagenomic data can also be performed from unassembled data (Arango-Argoty *et al.*,  
316 2018; Maestre-Carballa *et al.*, 2019). Here, the analysis from unassembled data (Suppl.  
317 Fig. 5; Suppl. Table 8) showed that major ARGs grouped by drug classes relative  
318 abundance was similar to the one obtained with assembled data shown in Fig. 1. Even  
319 though, we cannot rule out that the normalized abundances (no. of ARG per Mb) could  
320 be biased by the metagenomic assembly step or by the very short lengths of Illumina  
321 DNA reads and the predicted amino acid sequences obtained from the HMP datasets  
322 (Suppl. Fig. 6).

323

A manuscript submitted to *mSystems*

324 The different physiological conditions, bacteria-host interactions, and average genome  
325 size (AGS) (Nayfach and Pollard, 2015) present in each body part could be important  
326 factors contributing to the differences in ARG abundance, which were statistically  
327 significant for different paired body parts analyzed, except in the skin-nares pair (Fig.  
328 1C). In addition, the well-known inter-individual variability in the human microbiome  
329 was also observed here for ARG abundance. The highest ARG abundance was found in  
330 the nares, a body entrance for microorganisms carried by air, which could include  
331 pathogenic bacteria such as *Legionella* or *Mycobacterium* species. Airborne bacteria  
332 could also carry ARGs (Li *et al.*, 2018); therefore, antibiotic resistance genes could first  
333 arrive at the nares. It has been calculated that we inhale 7 m<sup>3</sup> of air and 10<sup>4</sup>-10<sup>6</sup> bacterial  
334 cells per cubic meter of air per day (Kumpitsch *et al.*, 2019) albeit the quantity varies  
335 depending on different factors, such as geography, weather, micro-niches and air  
336 pollution (Li *et al.*, 2018; Kumpitsch *et al.*, 2019; Zhang *et al.*, 2019). In addition,  
337 seasonal variation in bacterial species in the nares environment has been observed  
338 (Camarinha-Silva *et al.*, 2012). However, considering that bacteria present on the nares  
339 surface, in contrast to gut or oral bacteria, are not typically in “direct contact” with  
340 antibiotics, it is certainly surprising that the nares microbiome maintains the highest rate  
341 of ARG abundance, and more intriguing are the mechanisms used to acquire and fix  
342 these ARGs.

343

344 As shown in this study, the numbers of ARGs per assembled Mb in the gut was lower  
345 than that in the other body parts, but the ARG richness was greater. This observation is  
346 consistent with the results of Carr *et al.* (2020), who compared oral and fecal samples.  
347 Even though the abundance was measured with other parameters (reads per kilobase of  
348 read per million (RPKM) and coverage greater than 90%), the ARG abundance in stool  
349 was smaller than that in oral samples from China, the USA and Fiji but not western  
350 Europe (Carr *et al.*, 2020). Carr *et al.* (2020) hypothesized that different niches in the  
351 oral cavity, such as the dorsum of the tongue, could aid the deposition of debris and  
352 microbes or even the formation of biofilms, which are structures that favor HGT  
353 between different species (Giaouris *et al.*, 2015).

354

A manuscript submitted to *mSystems*

355 Regarding the bacterial species with antibiotic resistance, consistent with other studies,  
356 we found that commensals such as *Staphylococcus aureus* and *Staphylococcus*  
357 *epidermidis* in skin were the top 10 AR bacteria (Li *et al.*, 2021). Further, some of them,  
358 such as *S. aureus*, were multidrug-resistant bacteria, with a total of 4 ARGs in nares  
359 (*arlS*, *arlR*, *dha-2*, *mprF*) conferring resistance to 3 different antibiotic classes  
360 (fluoroquinolone, beta-lactam and cationic antibiotics). Additionally, as expected,  
361 methicillin-resistant *S. aureus* (MRSA), which is listed among the CDC's Antibiotic  
362 Resistance Threats in the United States (Centers for Disease Control and Prevention,  
363 2019), was present naturally in nares from different subjects. Another species found in  
364 oral HMP samples listed in the AR Threats report was *Streptococcus pneumoniae*.

365

366 Remarkably, our data give hope, since the dispersion of ARGs detected in the HMP  
367 dataset to pristine environments is extremely infrequent and anecdotal, with only one  
368 ARG in an autochthonous bacterium among dozens of millions of analyzed genes.  
369 Therefore, even using more relaxed thresholds, it can be considered as a *rara avis* event.  
370 As shown in Fig. 4, nearly all detected ARGs from pristine environments actually  
371 belonged to laboratory contaminants or exogenous bacteria that were not obviously  
372 found in these habitats (e.g., *E. coli* in hot springs). Sometimes, a general metagenomic  
373 analysis could mislead the interpretation of the data if sequencing and genomic  
374 assembled data is not carefully inspected. Our study exemplifies very well this bias  
375 since an initial ARG search detection indeed discovered a certain number of ARGs, but  
376 later on, it was demonstrated that they were clearly not naturally present in these  
377 pristine environments.

378

379 Finally, it is important to discuss potential caveats and biases of our study. Here, we  
380 have used sequence similarity-based searches with strict conservative thresholds for  
381 detecting ARGs in metagenomics datasets to avoid false positives. Only hits with amino  
382 acid identity  $\geq 90\%$  and bit-score  $\geq 70$  against ARGs deposited in curated reference  
383 antibiotic resistance databases were considered. This methodology has been widely used  
384 in previous publications (Van Goethem *et al.*, 2018; Chng *et al.*, 2020; Lira *et al.*,  
385 2020). Obviously, unknown ARGs yet to be discovered and therefore not present in  
386 reference ARG databases cannot be detected using our methodology. Likewise,

A manuscript submitted to *mSystems*

387 probably our approach has ruled out some actual ARGs present in samples that display  
388 a score similarity below our thresholds (i.e. false negatives). However, it is worth-  
389 noting, as highlighted in previous studies using our methodologies, that more rigorous  
390 thresholds are clearly preferred. It is very interesting to read the discussion on how  
391 using less strict thresholds when detecting ARGs in viruses can profoundly mislead data  
392 interpretation (Enault *et al.*, 2017)). This is even more important when analyzing  
393 datasets from pristine environments since a conservative approach is preferable over  
394 using riskier thresholds. Even though we have used strict thresholds to detect only *bona*  
395 *fide* ARGs, it may be noted that some genes could “scape” this filter. For instance, some  
396 housekeeping genes (constitutive genes required for basic cellular functions) only  
397 require one or few mutations to conferring antibiotic resistance (e.g. *rplS*, *gyrA*, *parY*).  
398 For instance, the mutant version of the housekeeping gene *gyrA* found in common  
399 antibiotic resistance databases used in this study, typically display a very short motif  
400 called “QRDR” that is responsible for quinolone resistance (Avalos *et al.*, 2015; Jia *et*  
401 *al.*, 2017). However, in our search in HMP datasets, despite having high similarity and  
402 above our thresholds, the great majority of detected *gyrA* proteins in HMP did not have  
403 this motif (Suppl. Fig. 4) and therefore was totally unclear whether they confer  
404 antibiotic resistance. Similar cases were found for other housekeeping genes, even when  
405 they displayed high sequence similarity. Thus, to avoid including false positives that  
406 would overestimate ARG abundance, housekeeping gene hits were ruled out from our  
407 analysis.

408

409 Overall, our study provides a comprehensive analysis of the human microbiome  
410 resistomes from different body sites studied by the HMP consortium, providing  
411 valuable biological insights that can serve as baseline for further studies and be thus  
412 integrated into AMR surveillance protocols to determine the fate of the diversity and  
413 abundance of ARGs in the long term. Our data also show that the level and impact of  
414 ARGs spreading and selection pressure to fix these alleles in non-anthropogenic areas is  
415 negligible. However, it is in our hands, as a society, to control these selection pressures  
416 and, if possible, reverse and ameliorate the impact of ARGs in nature.

## 417 **Experimental Procedures**

418 *Sample collection*

A manuscript submitted to *mSystems*

419 A total of 751 shotgun-sequenced samples from 15 different parts of the body from  
420 healthy American adults belonging to the Human Microbiome Project (HMP)  
421 (Huttenhower *et al.*, 2012) were retrieved from JGI-IMG/ER (Chen *et al.*, 2021) (Suppl.  
422 Table 1). Not all HMP assembled data present at JGI-IMG/ER was accessible, thus only  
423 the available metagenomes were included in this study. The data were organized in 5  
424 groups: Skin (retro-auricular crease), Nares, Gut, Vagina (posterior-fornix, mid vagina  
425 and vagina introitus), and oral cavity (hard palate, buccal mucosa, saliva, subgingival  
426 plaque, attached gingivae, tongue dorsum, throat, palatine tonsils, and supragingival  
427 plaque).

428 20 metagenomes belonging to left and right retro-auricular crease that could not be  
429 found in JGI-IMG were downloaded from the HMP page  
430 (<https://www.hmpdacc.org/HMASM/>) and included with the rest of HMP samples  
431 (Suppl. Table 1).

432 Proteins of 271 metagenomes from pristine environments (or environments with no or  
433 little human presence) were downloaded from JGI-IMG, and they were organized in 5  
434 groups: Arid deserts (65), submarine volcanoes (66), hot springs (68), polar  
435 environments (57) and caves (15) yielding a total of 76 Gb (Suppl. Table 6).  
436 Environments associated to a host (e.g., tubeworms) were also discarded.

#### 437 *HMP resistome in silico analysis*

438 Proteins from 751 samples of the HMP were retrieved from de JGI-IMG/ER (Chen *et*  
439 *al.*, 2021). In addition, 20 assembled metagenomes were downloaded directly from the  
440 HMP official page since they were not available in JGI. ORF of the genomic sequences  
441 downloaded from HMP were predicted with prodigal 2.6.3 (Hyatt *et al.*, 2010).

442 Then, all obtained proteins were compared using BLASTp 2.8.1+ with the following  
443 antibiotic resistance protein databases: CARD 3.0.3 (Jia *et al.*, 2017), ARG-ANNOT  
444 (Gupta *et al.*, 2014) and RESFAMS (Gibson *et al.*, 2015). Aiming to identify only  
445 high-confidence ARG, only those ARG with  $e\text{-value} \leq 10^{-5}$ , amino acid identity  $\geq 90\%$   
446 and bit-score  $\geq 70$  with the mentioned ARG databases were considered as hits, thus,  
447 being more conservative than other accepted thresholds (bit-score  $\geq 70$ ) (Enault *et al.*,  
448 2017).



A manuscript submitted to *mSystems*

449 The ARG were grouped, following CARD 3.0.3 annotation (Jia *et al.*, 2017), according  
450 to the drug class their confer resistance to. The taxonomic affiliation was extracted from  
451 the annotation found in JGI/IMG-ER (Chen *et al.*, 2021). To compare the obtained  
452 results, hits were normalized by the assembled Megabase pair (Mb).

453 Multiresistant contigs were manually curated, and only those with at least 2 different  
454 ARG conferring resistance to at least two different drug classes were included in the  
455 analysis. The abundance of metagenomes with multiresistant contigs was calculated by  
456 dividing the number of metagenomes with at least one multiresistant contig by the total  
457 number of metagenomes studied. The frequency of multiresistant species only in  
458 metagenomes with more than one multiresistant bacteria was done by dividing the  
459 number of multiresistant by the total number of contigs.

460 The presence of common ARGs in all the analysed parts of the body was performed  
461 using CD-HIT (90% identity) (Fu *et al.*, 2012) which was used to cluster all the ARGs  
462 found in the HMP.

463 For studying the effect of our threshold in housekeeping genes that requires few  
464 mutations to become resistant, *gyrA* proteins from the HMP dataset that were  
465 considered as ARG by our analysis were extracted and aligned against the *gyrA*  
466 fluoroquinolone resistant gene deposited in CARD (Jia *et al.*, 2017) from *Mycobacterium*  
467 *tuberculosis* (>gb|CCP42728.1|+|Mycobacterium tuberculosis *gyrA* conferring  
468 resistance to fluoroquinolones [Mycobacterium tuberculosis H37Rv]) and *gyrA*<sup>R</sup>  
469 obtained from RESFAMS (Gibson *et al.*, 2015) (NC\_002952\_2859949\_p01) from  
470 *Staphylococcus*. The alignment was performed with MUSCLE available in Geneious  
471 9.1.3.

472

### 473 *HMP antibiotic resistance genes in pristine environments*

474 To determine the presence of ARG from the HMP in pristine environments with  
475 presumptive low or none human presence, the ARGs obtained from the human samples  
476 were compared with the proteins from the chosen metagenomes using BLASTp 2.8.1+.  
477 Only those hits with an amino acid identity  $\geq 90\%$ , a bit-score  $\geq 70$  and e-value  $\leq 10^{-5}$   
478 were considered. The taxonomic annotation was retrieved from JGI-IMG/ER only for  
479 those scaffolds with at least 4 proteins to ensure the detection of HMP ARGs in

A manuscript submitted to *mSystems*

480 autochthonous bacteria (3 out of, at least, 4 proteins should be from the autochthonous  
481 bacteria). All the hits were manually curated to avoid false positives, especially those  
482 produced by housekeeping genes. Those belonging to taxons that could not be  
483 associated with a specific environment were discarded.

484 Alignments were performed using the software geneious 9.1.3.

485 Comparison between ARGs present in assembled and raw data was performed  
486 analysing paired unassembled and assembled metagenomes from 5 gut samples from  
487 different subjects (Subjects ID: 159005010, 159247771, 159369152, 763961826 and  
488 246515023; Suppl. Table 7) and from five buccal mucosa samples from 5 different  
489 subjects (Subjects ID: 370425937, 764325968, 604812005, 246515023 and 809635352;  
490 Suppl. Table 7). ARG in assembled data were detected with blastp as mentioned above.  
491 ARGs detection in raw data was performed with two different strategies: DeepARG  
492 (Arango-Argoty *et al.*, 2018), a machine learning algorithm that detects ARGs and  
493 normalises it by the number of 16S rRNA gene (90% identity, e-value  $\leq 10^{-10}$ ), and  
494 comparing the reads with blastx against the antibiotic resistance databases CARD (Jia *et al.*  
495 *et al.*, 2017), ARG-ANNOT (Gupta *et al.*, 2014) and RESFAMS (Gibson *et al.*, 2015) (e-  
496 value  $\leq 10^{-5}$ , amino acid identity  $\geq 90\%$  and bit-score  $\geq 70$ ) and normalised by the  
497 unassembled Mb.

498

#### 499 *Statistical analysis*

500 One-way ANOVA was performed to compare the ARG abundance (ARG/Mb) in each  
501 body site between samples from women and men.

502 Comparison between ARGs hits/Mb was performed with Welch test and pairwise.t.test  
503 in R (R Core Team, 2014). P-value  $\leq 0.05$  was considered as significant in all the  
504 statistical test performed.

505 PcoA analysis was performed calculating the distance matrix using the Euclidean  
506 distance and plotted with ggplot (Wickham, 2016). For the different sites of the body it  
507 was studied the relative abundance of each ARG categorized by antibiotic class  
508 resistance .

#### 509 *Acknowledgements*

A manuscript submitted to *mSystems*

510 We thank the support of Hospital Elche Crevillente Salud SL to conduct this research.  
511 We thank Yoshiko Misumi and Springer Nature Author Services team for their English  
512 edition.

### 513 ***Funding***

514 This project was supported by the Office of the Vice President for Research,  
515 Development and Innovation (University of Alicante) with a grant from the  
516 program "predoctoral training in collaboration with companies" (ref. UAIND18-05).  
517 Funds were also provided by Hospital Elche Crevillente Salud SL (ref.  
518 HOSPITALECLHE1-18Y).

519

### 520 **References**

- 521 Arango-Argoty, G., Garner, E., Pruden, A., Heath, L.S., Vikesland, P., and Zhang, L.  
522 (2018) DeepARG: a deep learning approach for predicting antibiotic resistance  
523 genes from metagenomic data. *Microbiome* **6**: 23.
- 524 Atlas, R.M. (2012) One Health: Its Origins and Future. 1–13.
- 525 Avalos, E., Catanzaro, D., Catanzaro, A., Ganiats, T., Brodine, S., Alcaraz, J., and  
526 Rodwell, T. (2015) Frequency and Geographic Distribution of gyrA and gyrB  
527 Mutations Associated with Fluoroquinolone Resistance in Clinical Mycobacterium  
528 Tuberculosis Isolates: A Systematic Review. *PLoS One* **10**: e0120470.
- 529 Baron, S.A., Diene, S.M., and Rolain, J.M. (2018) Human microbiomes and antibiotic  
530 resistance. *Hum Microbiome J* **10**: 43–52.
- 531 Van Boeckel, T.P., Gandra, S., Ashok, A., Caudron, Q., Grenfell, B.T., Levin, S.A., and  
532 Laxminarayan, R. (2014) Global antibiotic consumption 2000 to 2010: An analysis  
533 of national pharmaceutical sales data. *Lancet Infect Dis* **14**: 742–750.
- 534 Brogan, D.M. and Mossialos, E. (2016) A critical analysis of the review on  
535 antimicrobial resistance report and the infectious disease financing facility. *Global*  
536 *Health* **12**: 8.
- 537 Camarinha-Silva, A., Jáuregui, R., Pieper, D.H., and Wos-Oxley, M.L. (2012) The  
538 temporal dynamics of bacterial communities across human anterior nares. *Environ*  
539 *Microbiol Rep* **4**: 126–132.
- 540 Carr, V.R., Witherden, E.A., Lee, S., Shoaie, S., Mullany, P., Proctor, G.B., et al.

A manuscript submitted to *mSystems*

- 541 (2020) Abundance and diversity of resistomes differ between healthy human oral  
542 cavities and gut. *Nat Commun* **11**: 1–10.
- 543 Centers for Disease Control and Prevention (2019) Antibiotic resistance threats in the  
544 United States. *Centers Dis Control Prev* 1–113.
- 545 Chen, I.M.A., Chu, K., Palaniappan, K., Ratner, A., Huang, J., Huntemann, M., et al.  
546 (2021) The IMG/M data management and analysis system v.6.0: New tools and  
547 advanced capabilities. *Nucleic Acids Res* **49**: D751–D763.
- 548 Chng, K.R., Li, C., Bertrand, D., Ng, A.H.Q., Kwah, J.S., Low, H.M., et al. (2020)  
549 Cartography of opportunistic pathogens and antibiotic resistance genes in a tertiary  
550 hospital environment. *Nat Med* 2020 266 **26**: 941–951.
- 551 Dang, H., Ren, J., Song, L., Sun, S., and An, L. (2008) Dominant chloramphenicol-  
552 resistant bacteria and resistance genes in coastal marine waters of Jiaozhou Bay,  
553 China. *World J Microbiol Biotechnol* **24**: 209–217.
- 554 Emamalipour, M., Seidi, K., Zununi Vahed, S., Jahanban-Esfahlan, A., Jaymand, M.,  
555 Majdi, H., et al. (2020) Horizontal Gene Transfer: From Evolutionary Flexibility to  
556 Disease Progression. *Front Cell Dev Biol* **8**: 229.
- 557 Enault, F., Briet, A., Bouteille, L., Roux, S., Sullivan, M.B., and Petit, M.-A. (2017)  
558 Phages rarely encode antibiotic resistance genes: a cautionary tale for virome  
559 analyses. *ISME J* **11**: 237–247.
- 560 Etebu, E. and Arikekpar, I. (2016) Antibiotics: Classification and mechanisms of action  
561 with emphasis on molecular perspectives. *Int J Appl Microbiol Biotechnol Res* **4**:  
562 90–101.
- 563 Fu, L., Niu, B., Zhu, Z., Wu, S., and Li, W. (2012) CD-HIT: Accelerated for clustering  
564 the next-generation sequencing data. *Bioinformatics* **28**: 3150–3152.
- 565 Giaouris, E., Heir, E., Desvaux, M., Hébraud, M., Møretrø, T., Langsrud, S., et al.  
566 (2015) Intra- and inter-species interactions within biofilms of important foodborne  
567 bacterial pathogens. *Front Microbiol* **6**: 841.
- 568 Gibson, M.K., Forsberg, K.J., and Dantas, G. (2015) Improved annotation of antibiotic  
569 resistance determinants reveals microbial resistomes cluster by ecology. *ISME J* **9**:  
570 207–16.

A manuscript submitted to *mSystems*

- 571 Van Goethem, M.W., Pierneef, R., Bezuidt, O.K.I., Van De Peer, Y., Cowan, D.A., and  
572 Makhalanyane, T.P. (2018) A reservoir of “historical” antibiotic resistance genes  
573 in remote pristine Antarctic soils. *Microbiome* **6**: 40.
- 574 Gupta, S.K., Padmanabhan, B.R., Diene, S.M., Lopez-Rojas, R., Kempf, M., Landraud,  
575 L., and Rolain, J.-M. (2014) ARG-ANNOT, a new bioinformatic tool to discover  
576 antibiotic resistance genes in bacterial genomes. *Antimicrob Agents Chemother* **58**:  
577 212–220.
- 578 Hicks, L.A., Taylor, T.H., and Hunkler, R.J. (2013) U.S. Outpatient Antibiotic  
579 Prescribing, 2010. *N Engl J Med* **368**: 1461–1462.
- 580 Hu, Y., Yang, X., Qin, J., Lu, N., Cheng, G., Wu, N., et al. (2013) Metagenome-wide  
581 analysis of antibiotic resistance genes in a large cohort of human gut microbiota.  
582 *Nat Commun* **4**: 1–7.
- 583 Huttenhower, C., Gevers, D., Knight, R., Abubucker, S., Badger, J.H., Chinwalla, A.T.,  
584 et al. (2012) Structure, function and diversity of the healthy human microbiome.  
585 *Nature* **486**: 207–214.
- 586 Hyatt, D., Chen, G.-L., LoCascio, P.F., Land, M.L., Larimer, F.W., and Hauser, L.J.  
587 (2010) Prodigal: prokaryotic gene recognition and translation initiation site  
588 identification. *BMC Bioinformatics* **11**: 119.
- 589 IACG (2019) No time to wait: securing the future from drug-resistant infections report  
590 to the secretary-general of the united nations.
- 591 Jia, B., Raphenya, A.R., Alcock, B., Waglechner, N., Guo, P., Tsang, K.K., et al. (2017)  
592 CARD 2017: expansion and model-centric curation of the comprehensive  
593 antibiotic resistance database. *Nucleic Acids Res* **45**: D566–D573.
- 594 Ju, F., Beck, K., Yin, X., Maccagnan, A., McArdell, C.S., Singer, H.P., et al. (2018)  
595 Wastewater treatment plant resistomes are shaped by bacterial composition,  
596 genetic exchange, and upregulated expression in the effluent microbiomes. *ISME J*  
597 1.
- 598 Khan, F.A., Söderquist, B., and Jass, J. (2019) Prevalence and diversity of antibiotic  
599 resistance genes in Swedish aquatic environments impacted by household and  
600 hospital wastewater. *Front Microbiol* **10**: 688.

A manuscript submitted to *mSystems*

- 601 Kumpitsch, C., Koskinen, K., Schöpf, V., and Moissl-Eichinger, C. (2019) The  
602 microbiome of the upper respiratory tract in health and disease. *BMC Biol* **17**: 1–  
603 20.
- 604 Li, J., Cao, J., Zhu, Y., Chen, Q., Shen, F., Wu, Y., et al. (2018) Global Survey of  
605 Antibiotic Resistance Genes in Air. *Environ Sci Technol* **52**: 10975–10984.
- 606 Li, Z., Xia, J., Jiang, L., Tan, Y., An, Y., Zhu, X., et al. (2021) Characterization of the  
607 human skin resistome and identification of two microbiota cutotypes. *Microbiome*  
608 **9**: 47.
- 609 Lira, F., Vaz-Moreira, I., Tamames, J., Manaia, C.M., and Martínez, J.L. (2020)  
610 Metagenomic analysis of an urban resistome before and after wastewater  
611 treatment. *Sci Reports 2020 101* **10**: 1–9.
- 612 Maestre-Carballa, L., Lluesma Gomez, M., Angla Navarro, A., Garcia-Heredia, I.,  
613 Martinez-Hernandez, F., and Martinez-Garcia, M. (2019) Insights into the  
614 antibiotic resistance dissemination in a wastewater effluent microbiome: bacteria,  
615 viruses and vesicles matter. *Environ Microbiol.*
- 616 Methé, B.A., Nelson, K.E., Pop, M., Creasy, H.H., Giglio, M.G., Huttenhower, C., et al.  
617 (2012) A framework for human microbiome research. *Nature* **486**: 215–221.
- 618 Naidoo, Y., Valverde, A., Cason, E.D., Pierneef, R.E., and Cowan, D.A. (2020) A  
619 clinically important, plasmid-borne antibiotic resistance gene ( $\beta$ -lactamase TEM-  
620 116) present in desert soils. *Sci Total Environ* **719**: 137497.
- 621 Nayfach, S. and Pollard, K.S. (2015) Average genome size estimation improves  
622 comparative metagenomics and sheds light on the functional ecology of the human  
623 microbiome. *Genome Biol* **16**: 1–18.
- 624 Nelson, R.E., Hatfield, K.M., Wolford, H., Samore, M.H., Scott, R.D., Reddy, S.C., et  
625 al. (2021) National Estimates of Healthcare Costs Associated With Multidrug-  
626 Resistant Bacterial Infections Among Hospitalized Patients in the United States.  
627 *Clin Infect Dis* **72**: S17–S26.
- 628 O’Neill, J. (2016) Tackling drug-resistant infections globally: final report and  
629 recommendations, United Kingdom.
- 630 Olivares, J., Bernardini, A., Garcia-Leon, G., Corona, F., Sanchez, M.B., and Martinez,



A manuscript submitted to *mSystems*

- 631 J.L. (2013) The intrinsic resistome of bacterial pathogens. *Front Microbiol* **4**: 103.
- 632 Palleja, A., Mikkelsen, K.H., Forslund, S.K., Kashani, A., Allin, K.H., Nielsen, T., et al.  
633 (2018) Recovery of gut microbiota of healthy adults following antibiotic exposure.  
634 *Nat Microbiol* **3**: 1255–1265.
- 635 R Core Team (2014) R: A Language and Environment for Statistical Computing. *R*  
636 *Found Stat Comput.*
- 637 Reygaert, W.C. (2018) An overview of the antimicrobial resistance mechanisms of  
638 bacteria. *AIMS Microbiol* **4**: 482–501.
- 639 Rodriguez-Mozaz, S., Vaz-Moreira, I., Varela Della Giustina, S., Llorca, M., Barceló,  
640 D., Schubert, S., et al. (2020) Antibiotic residues in final effluents of European  
641 wastewater treatment plants and their impact on the aquatic environment. *Environ*  
642 *Int* **140**: 105733.
- 643 Rowe, W.P.M., Baker-Austin, C., Verner-Jeffreys, D.W., Ryan, J.J., Micallef, C.,  
644 Maskell, D.J., and Pearce, G.P. (2017) Overexpression of antibiotic resistance  
645 genes in hospital effluents over time. *J Antimicrob Chemother* **72**: 1617–1623.
- 646 Salyers, A.A., Gupta, A., and Wang, Y. (2004) Human intestinal bacteria as reservoirs  
647 for antibiotic resistance genes. *Trends Microbiol* **12**: 412–416.
- 648 Shaw, W. V., Packman, L.C., Burleigh, B.D., Dell, A., Morris, H.R., and Hartley, B.S.  
649 (1979) Primary structure of a chloramphenicol acetyltransferase specified by R  
650 plasmids [31]. *Nature* **282**: 870–872.
- 651 Ventola, C.L. (2015) The antibiotic resistance crisis: causes and threats. *P T J* **40**: 277–  
652 83.
- 653 Wickham, H. (2016) ggplot2: Elegant Graphics for Data Analysis, Springer-Verlag  
654 New York.
- 655 Wright, G.D. (2010) Q&A: Antibiotic resistance: where does it come from and what  
656 can we do about it? *BMC Biol* **2010 81** **8**: 1–6.
- 657 Zhang, T., Li, X., Wang, M., Chen, H., Yang, Y., Chen, Q. lin, and Yao, M. (2019)  
658 Time-resolved spread of antibiotic resistance genes in highly polluted air. *Environ*  
659 *Int* **127**: 333–339.

A manuscript submitted to *mSystems*

660

661

662

663

664

665

666

667

668

669

670

671

672

673 **Figures and Figure Legends**

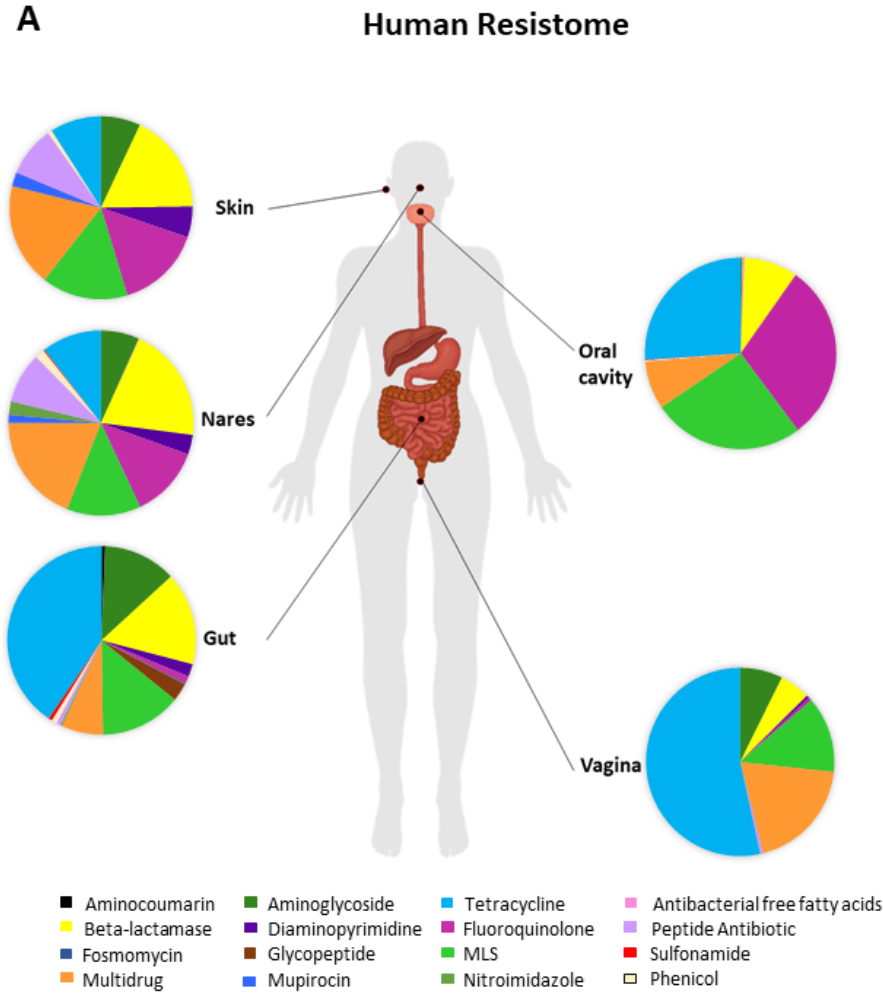

674

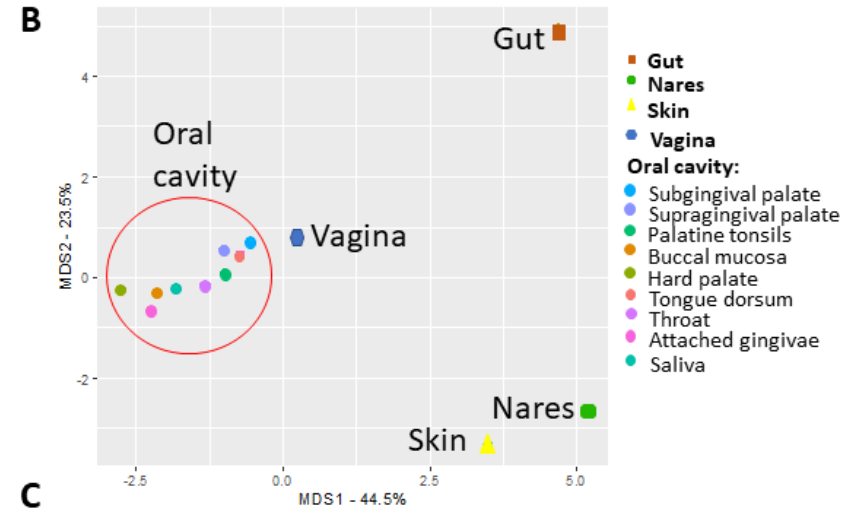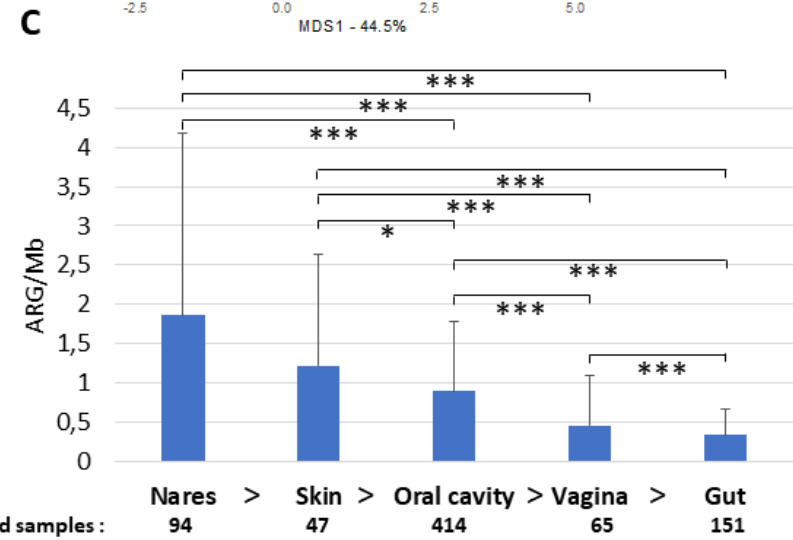

675 **Fig. 1. Human Resistome.** Human atlas of the ARGs grouped by drug class their confer resistance to present in different body parts. The body  
676 groups studied were the gut, the skin (retroauricular crease), vagina (posterior-fornix, mid vagina and vagina intraotus), the nares and the oral  
677 cavity (hard palate, buccal mucosa, saliva, subgingival plaque, attached gingivae, tongue dorsum, throat, palatine tonsils, and supragingival  
678 plaque) (A). PCoA analysis of the different body sites distributed according to their relative abundance of AR to different drug classes (B). The  
679 samples included in the group oral cavity (hard palate, buccal mucosa, saliva, subgingival plaque, attached gingivae, tongue dorsum, throat,  
680 palatine tonsils, and supragingival plaque -shaped as a circle-) gathered together and separately from nares, skin and gut samples. Abundance of  
681 antibiotic resistance genes calculated as ARGs hits per assembled Mb and number of samples included in each body group (C). Welch test was  
682 performed to compare ARG abundances between different body sites. All paired samples showed statistically significant differences but the  
683 nares and the skin. P-values (P) considerer as significant were indicated with an asterisk:  $P \leq 0.05$  \*,  $P \leq 0.01$  \*\*,  $P \leq 0.001$  \*\*\*.

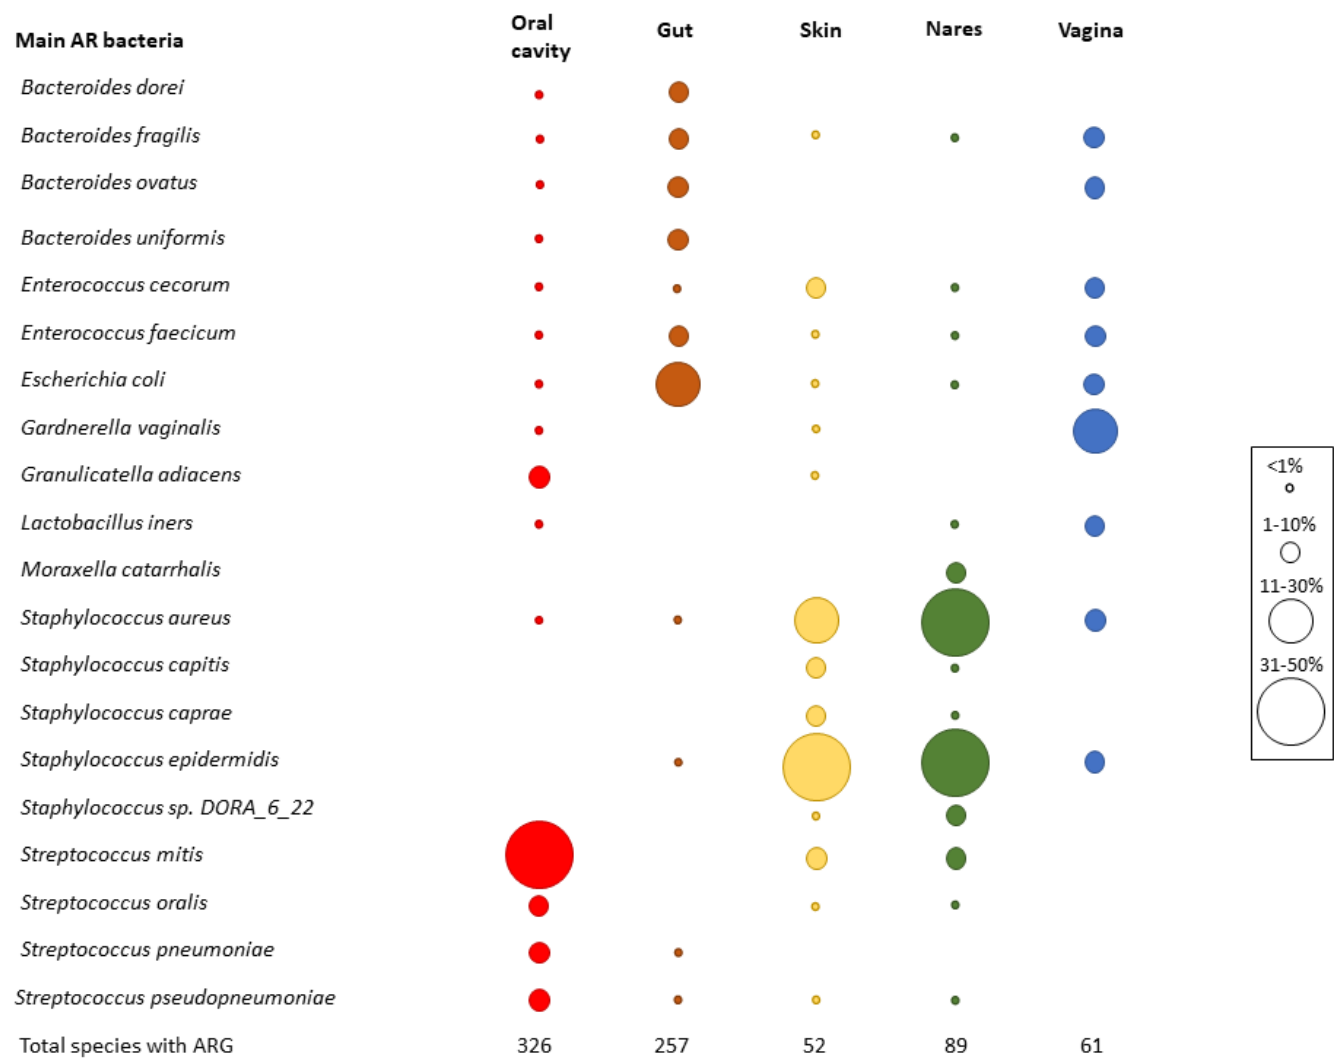

685 **Fig. 2.** Main antibiotic resistant bacteria in HMP dataset. Relative abundance of the most abundant resistant bacteria. Top five bacteria were  
686 chosen in each body part and then the graphic was completed with the relative frequency of all the chosen bacteria in all body parts. Circle sizes  
687 were different to determine the relative abundance of each species and colours were used to differentiate the body parts (red-oral cavity, brown-  
688 gut, skin-yellow,green-nares,blue-vagina). At the bottom of the graphic the number of different species that carried ARGs is shown.  
689



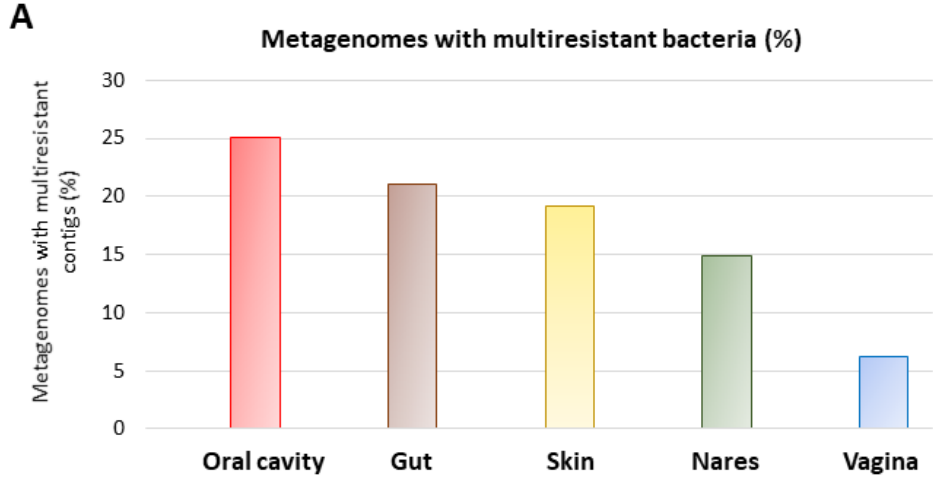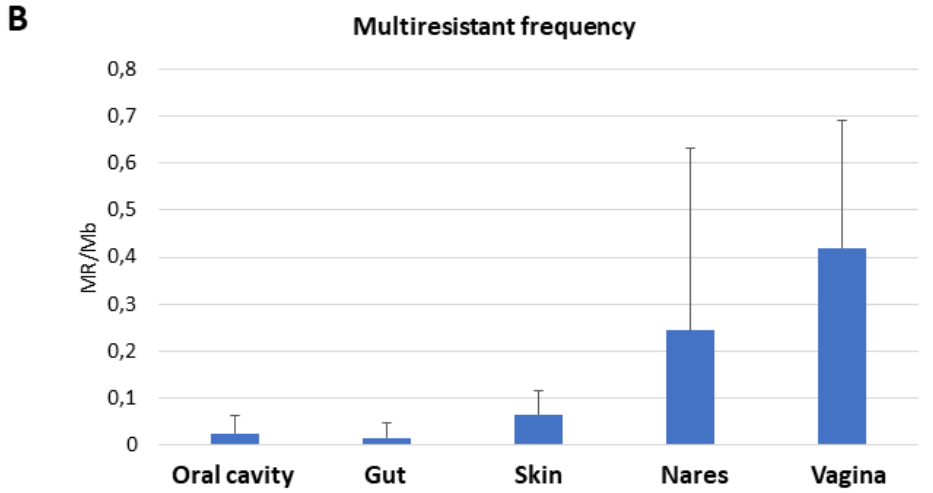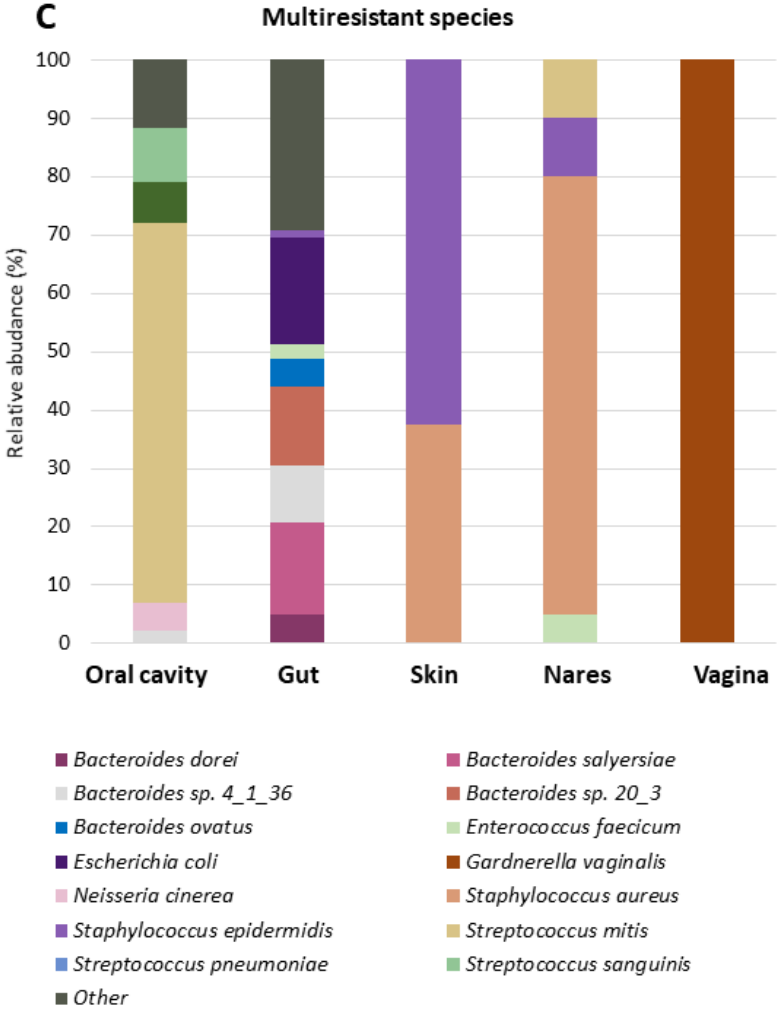

691 **Fig. 3.** Multiresistance in the human body. Those assembled genome fragments (i.e. contigs) that had more than one ARG conferring resistance  
692 to at least 2 different antibiotic families were considered as multiresistant (MR). Percentage of metagenomes with multiresistant contigs  
693 compared with all the metagenomes studied from the same HMP sample (A). Study of the multiresistant contigs frequency in metagenomes with  
694 at least one multiresistant contig (B), to compare the different samples, the number of multiresistant contigs was divided by the assembled Mb.  
695 Standard deviation is shown in the graphic. Relative abundance of the most abundant MR (C). Only MR whose relative abundance was, at least  
696 in one body site, equal or greater than 5% were represented.

697

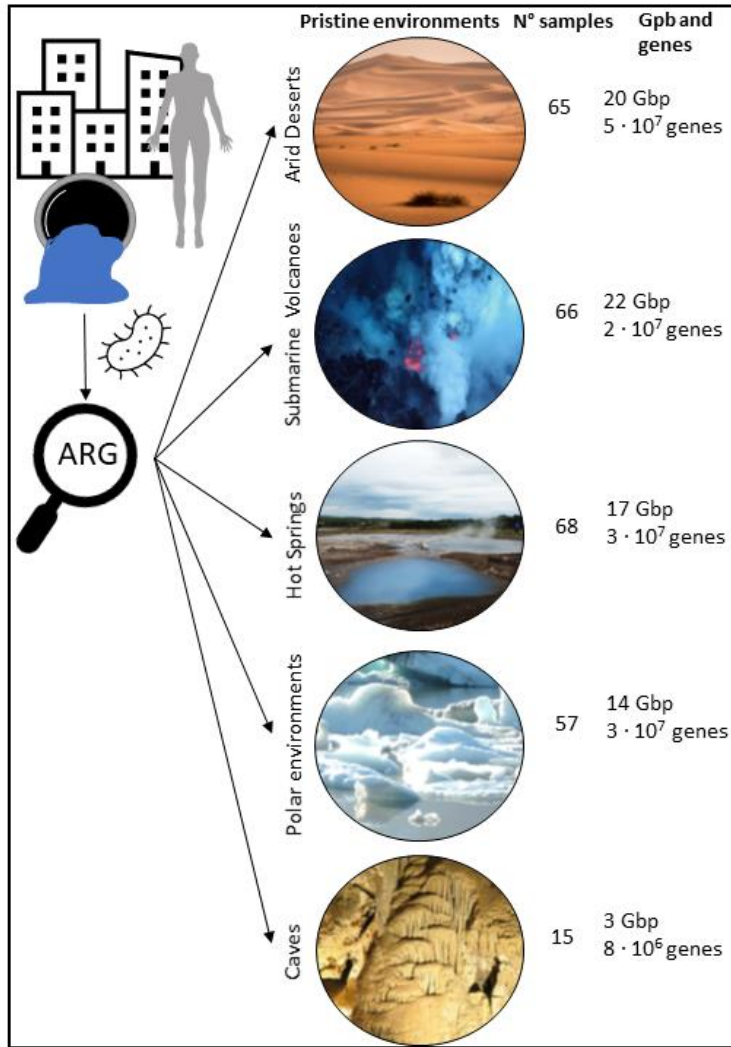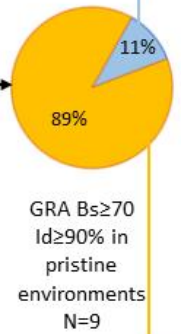

GRA Bs $\geq$ 70  
Id $\geq$ 90% in  
pristine  
environments  
N=9

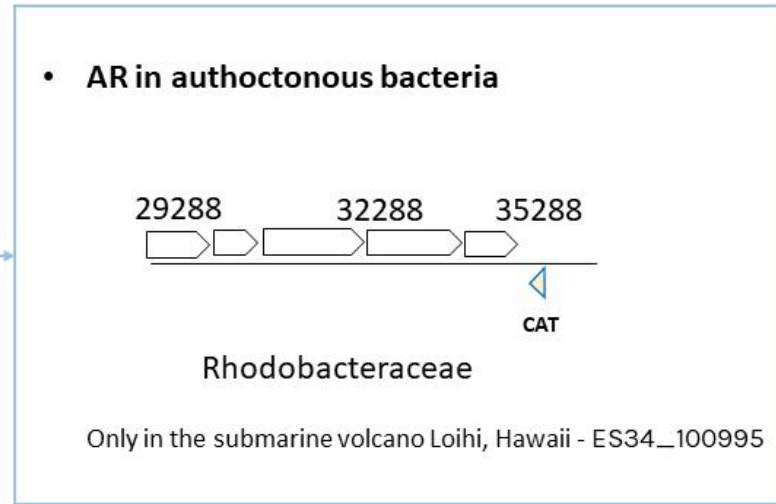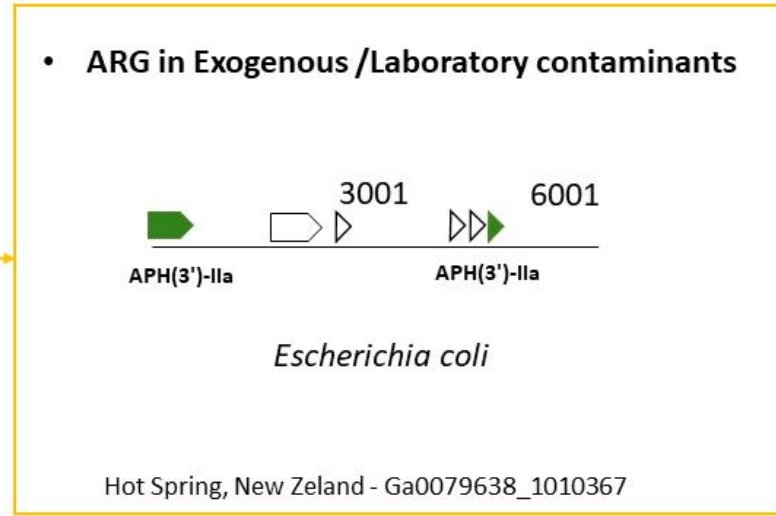

"Rara avis"

699 **Fig. 4.** Detection of ARGs from Human Microbiome Project dataset in pristine environments (arid deserts (n=65), submarine volcanoes (n=66),  
700 hot springs (n=68), polar environment (n=57) and caves (n=15)). Only 9 ARGs were found in pristine environments according to our criteria (see  
701 methods and results). The only case of ARG found in an autochthonous bacterium in pristine environments was that of a chloramphenicol  
702 acetyltransferase (CAT) gene belonging to *Salmonella* sp. (100% identity with Ga0111015\_155701; a nares sample) present in a marine  
703 bacterium found in Loihi (a submarine volcano) from the family *Rhodobacteraceae*. The presence of CAT from *Enterobacteriaceae* in  
704 *Rhodobacter* has been previously described in the coastal water of Jiaozhou Bay, (Dang *et al.*, 2008). Chloramphenicol-resistant bacteria often  
705 harbor plasmids carrying the CAT gene (Shaw *et al.*, 1979) that could have been transferred to *Rhodobacter*. Desert photo taken from Boris  
706 Ulzibat (PEXELS). Submarine volcano photograph courtesy of NOAA / NSF / WHOI page  
707 (<https://oceanexplorer.noaa.gov/facts/volcanoes.html>).

A manuscript submitted to *mSystems*

708

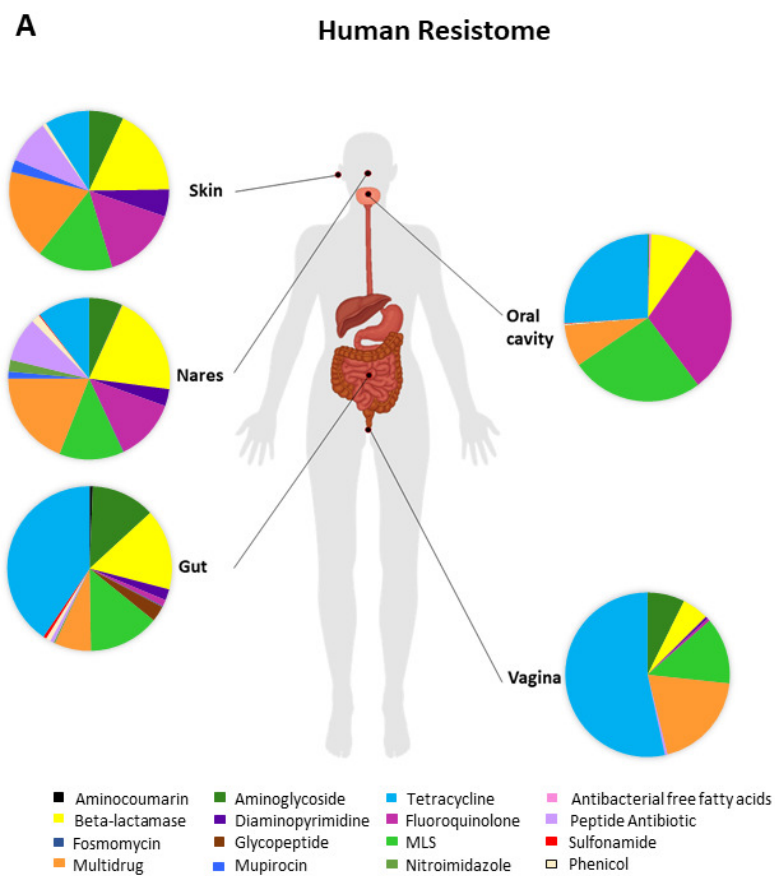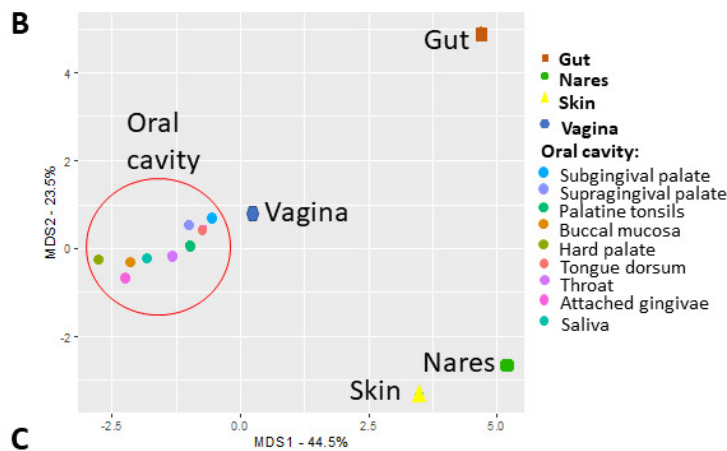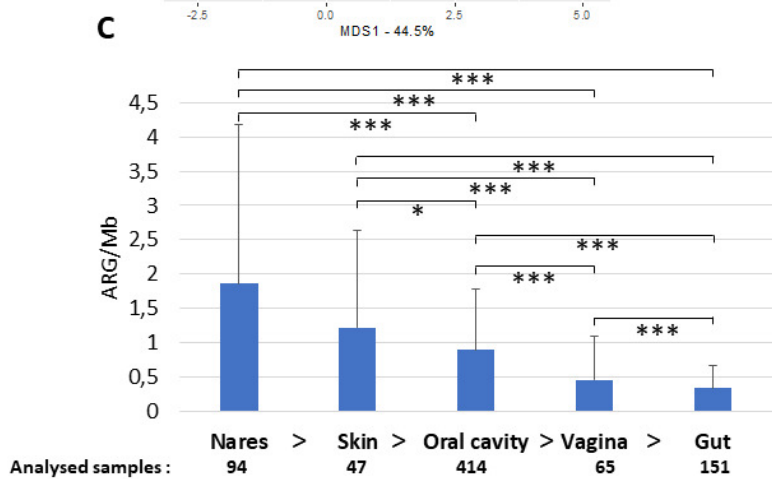



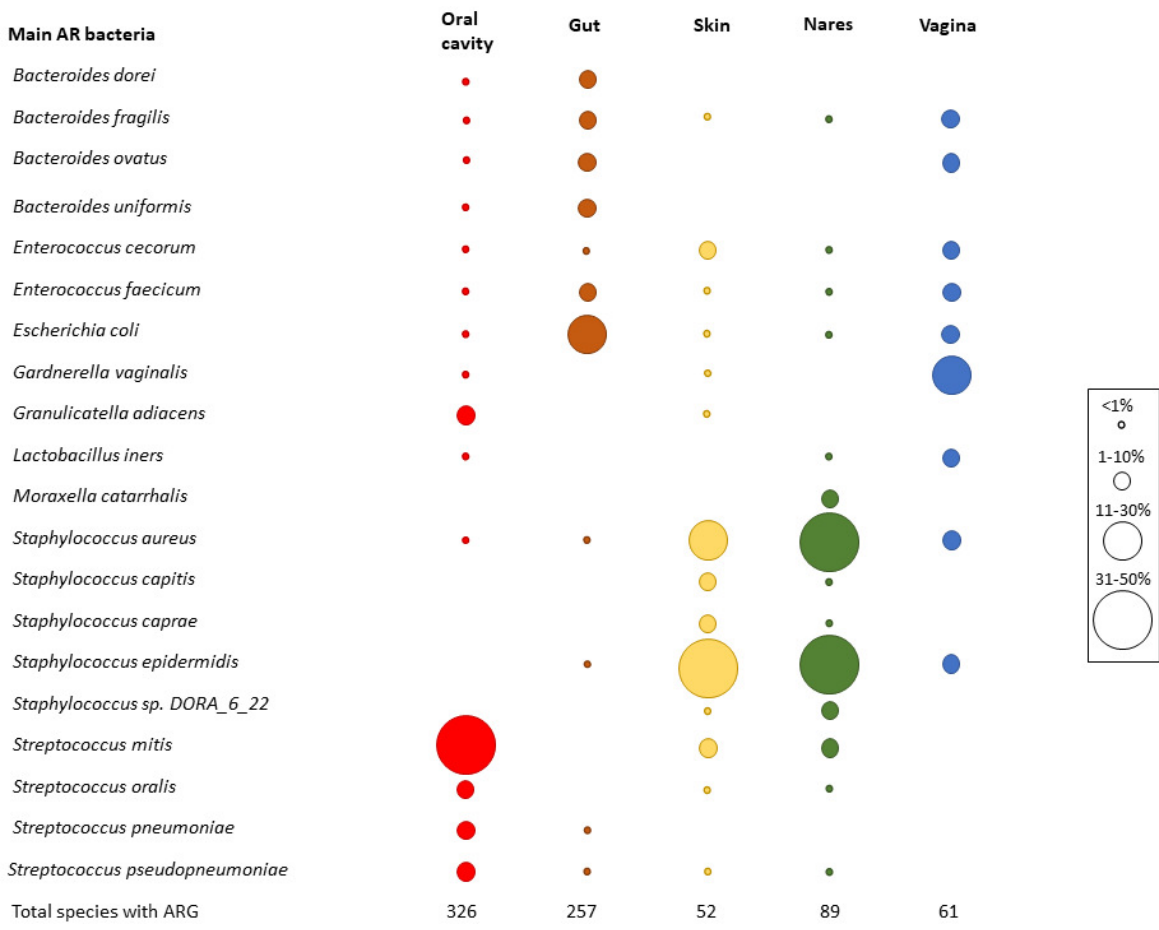

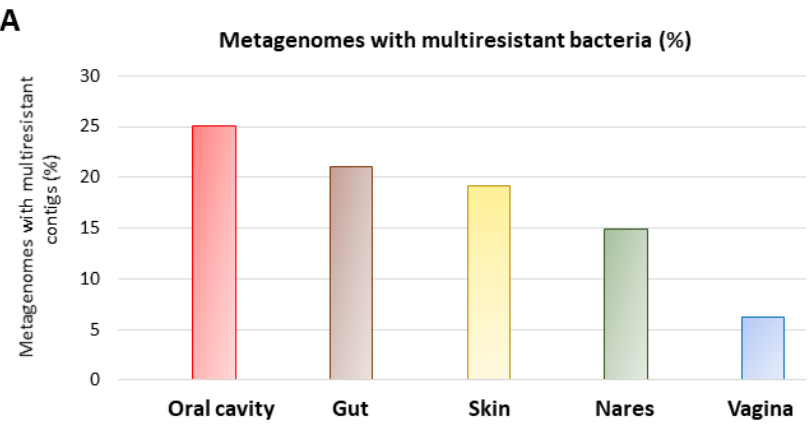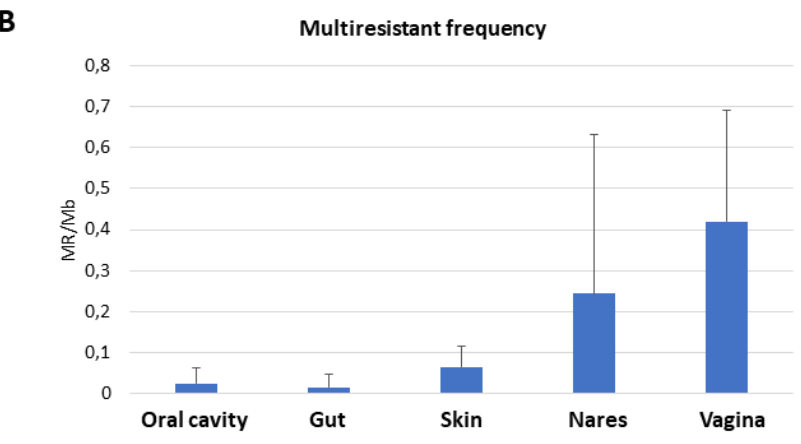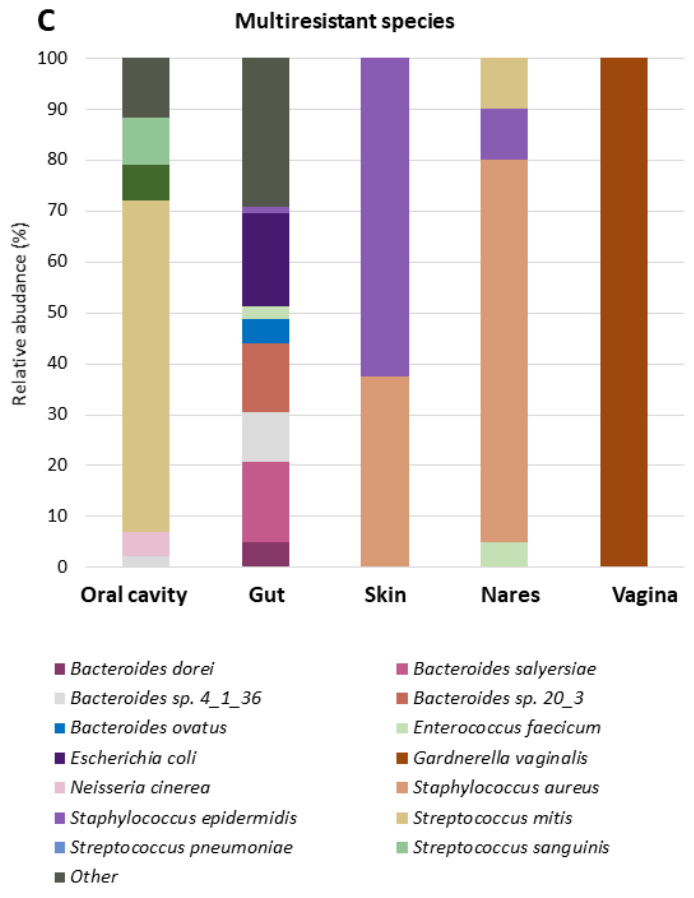

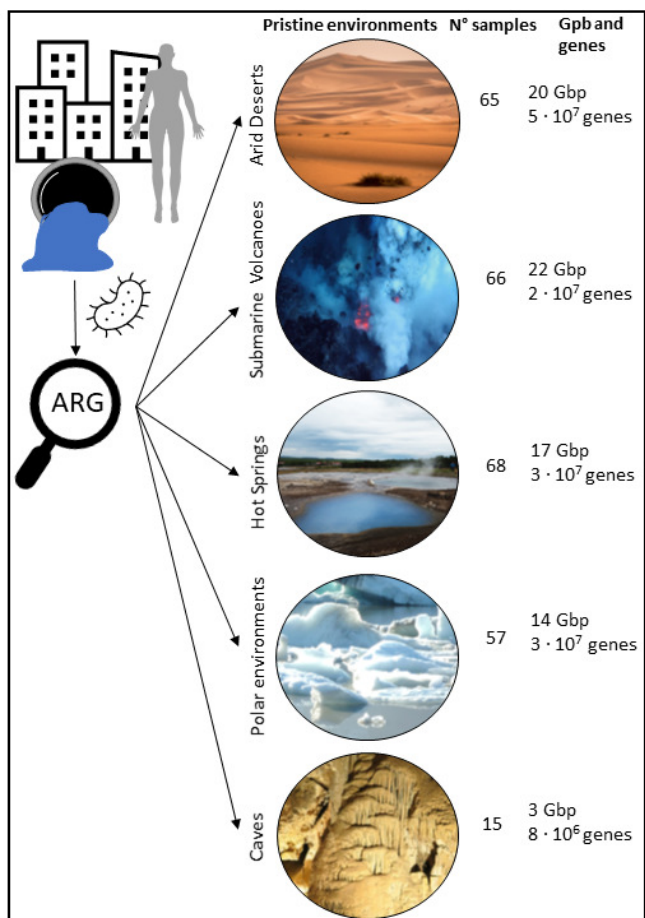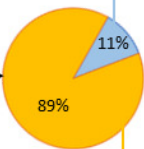

GRA Bs  $\geq 70$   
Id  $\geq 90\%$  in  
pristine  
environments  
N=9

• **AR in autochthonous bacteria**

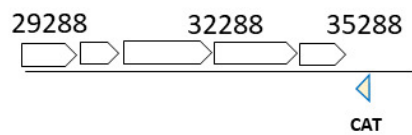

*Rhodobacteraceae*

Only in the submarine volcano Loihi, Hawaii - ES34\_100995

• **ARG in Exogenous /Laboratory contaminants**

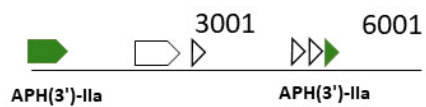

*Escherichia coli*

Hot Spring, New Zeland - Ga0079638\_1010367

"Rara avis"
